# Supplementary material for: Phosphorylated Acetyl-CoA Carboxylase Is Associated with Clinical Benefit with Regorafenib in Relapsed Glioblastoma: REGOMA Trial Biomarker Analysis
Source: Oxford University Press journal article supplement (doi:10.1158/1078-0432.ccr-19-4055), 2020-06-09
Supplement: 10780432ccr194055-sup-233910_2_supp_6316077_q6vt69.docx [file 10780432ccr194055-sup-233910_2_supp_6316077_q6vt69.docx]

**
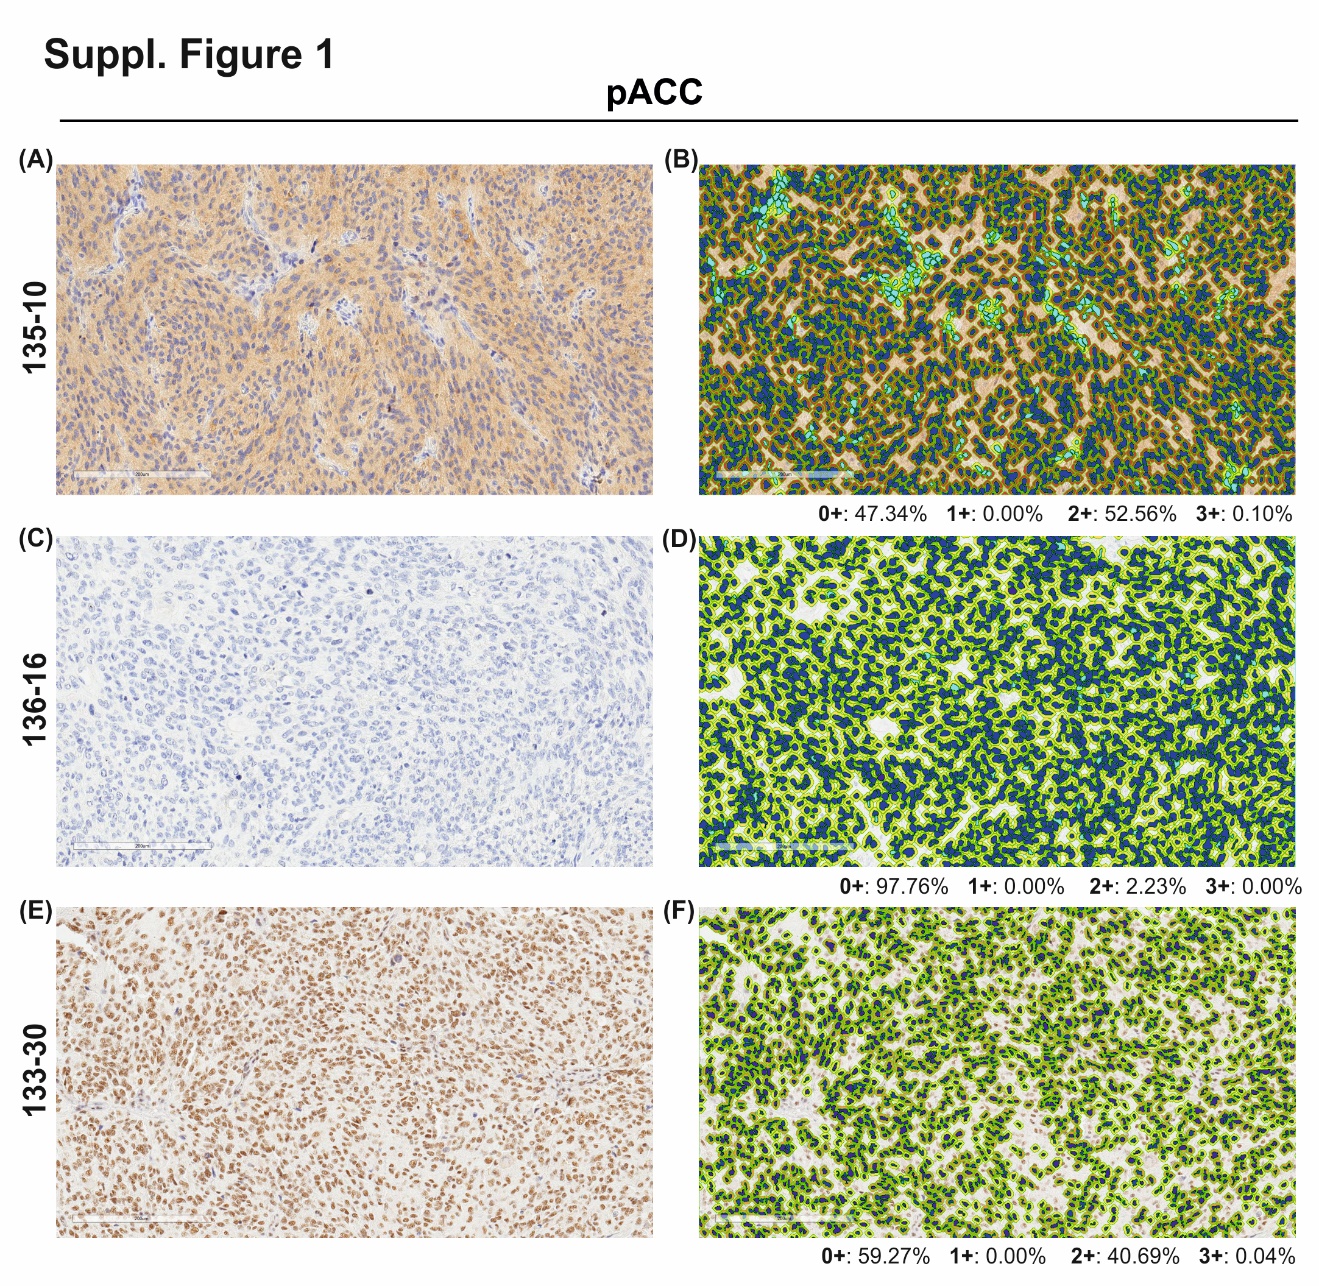
**

**Supplementary figure 1.** Immunohistochemical staining of pACC in three representative GBM samples: (A) positive pACC cytoplasmic expression, (C) negative pACC cytoplasmic expression, (E) positive pACC nuclear expression. Haematoxylin-Eosin counterstain.Visualization of final mark-up of the same analyzed tissue by the Aperio Cytoplasmic Algorithm to quantify pACC expression in tumor. The algorithm used automatically detects and classifies cytoplasmic expression as positive (2+/brown) (B) or as negative (0+/yellow) (D). Image (F) shows quantification of nuclear positivity. Original magnification 10X.
