# Supplementary material for: Phosphorylated Acetyl-CoA Carboxylase Is Associated with Clinical Benefit with Regorafenib in Relapsed Glioblastoma: REGOMA Trial Biomarker Analysis
Source: Oxford University Press journal article supplement (doi:10.1158/1078-0432.ccr-19-4055), 2020-06-09
Supplement: 10780432ccr194055-sup-233910_2_supp_6316079_qcvtc9.docx [file 10780432ccr194055-sup-233910_2_supp_6316079_qcvtc9.docx]

**Supplementary Figure 3**


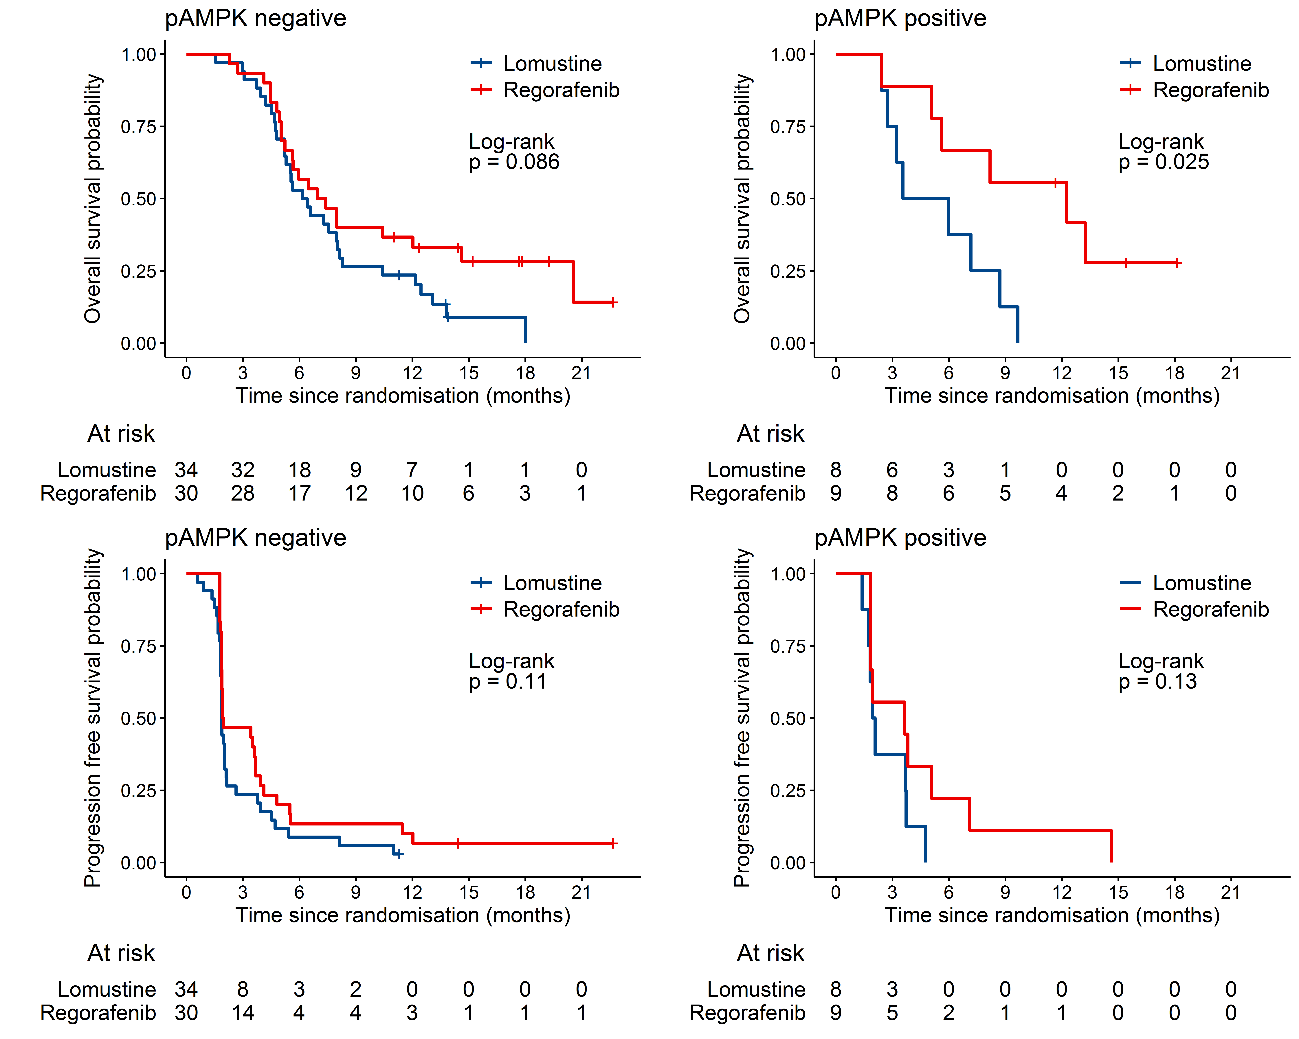


**Supplementary figure 1.** Kaplan-Meier curves of overall survival (top) and progression free survival (bottom) according to pAMPK status (negative: graphs on the left, positive: graphs on the right). No statistically significant interaction between treatment and pAMPK tumor status was demonstrated in terms of PFS (interaction test p-value = 0.7452) or OS (interaction test p-value = 0.2257).
