# Supplementary material for: Phosphorylated Acetyl-CoA Carboxylase Is Associated with Clinical Benefit with Regorafenib in Relapsed Glioblastoma: REGOMA Trial Biomarker Analysis
Source: Oxford University Press journal article supplement (doi:10.1158/1078-0432.ccr-19-4055), 2020-06-09
Supplement: 10780432ccr194055-sup-233910_2_supp_6316081_qlvtl9.xlsx [file 10780432ccr194055-sup-233910_2_supp_6316081_qlvtl9.xlsx]

## Sheet: CD31
Suppl. Table 2. Digital pathology values of microvessel density (MVD) evaluated by IHC in GBM samples
Sample ID	MVD (Microvessel density mm2)
133-1	101.963
133-2	200.742
133-3	179.946
133-4	467.745
133-6	97.6042
133-7	82.0018
133-8	114.207
133-12	81.0829
133-16	213.194
133-17	493.503
133-20	67.5601
133-22	46.1072
133-24	90.5384
133-27	126.498
133-28	38.0903
133-29	268.063
133-30	289.849
134-5	90.2615
134-6	129.024
134-7	77.0333
134-8	437.324
134-10	109.832
134-13	114.584
135-3	65.7327
135-7	18.7762
135-9	360.658
135-10	110.77
135-11	32.6679
135-13	113.134
135-14	719.949
135-19	41.304
136-1	47.0551
136-5	84.0959
136-6	71.671
136-8	140.039
136-10	91.2771
136-13	31.9646
136-16	51.0909
136-22	501.049
138-1	39.0658
138-2	96.5174
138-3	92.7577
140-1	97.1306
140-2	547.106
142-1	112.099
142-2	171.305
142-3	95.1078
142-4	86.5338
142-5	144.193
142-6	126.396
142-7	344.216
142-8	214.907
